# Supplementary material for: Extraordinary Interactions of piRNAs with mRNA of Candidate Genes in Esophageal Squamous Cell Carcinoma
Source: Preprints.org preprint supplement (doi:10.20944/preprints202305.1046.v1), 2023-05-15
Supplement: Supplementary file 2 [file supplementary]

Archive with 11 entries (11 files):
- Supplement 2/Table S1.docx
- Supplement 2/Table S2.xlsx
- Supplement 2/Table S11.docx
- Supplement 2/Table S9.xlsx
- Supplement 2/Table S8.xlsx
- Supplement 2/Table S4.xlsx
- Supplement 2/Table S5.xlsx
- Supplement 2/Table S7.xlsx
- Supplement 2/Table S3.xlsx
- Supplement 2/Table S6.xlsx
- Supplement 2/Table S10.xlsx
