# Supplementary material for: Extraordinary Interactions of piRNAs with mRNA of Candidate Genes in Esophageal Squamous Cell Carcinoma
Source: Preprints.org preprint supplement (doi:10.20944/preprints202305.1046.v1), 2023-05-15
Supplement: Supplementary file 2 [file supplementary › Supplement 2/Table S1.docx]

**Table S1**. List of candidate genes for ESCC.

| Gene | PubMed | Gene | PubMed | Gene | PubMed |
| --- | --- | --- | --- | --- | --- |
| *ABCG2* | **22236447** | *EMP1* | **22888304** | *MMP13* | **32035950** |
| *ADAMTS12* | **31236983** | *ERCC1* | **32611208** | *MMP2* | **32436041** |
| *ADAMTS2* | 29358879 | *FSCN1* | **35401239** | *MMP3* | **30969151** |
| *ADH1A* | 29248712 | *GCOM1* | 25823933 | *MMP7* | **21455340** |
| *ADH1B* | 27038040 | *HLA-G* | 29067119 | *MMP9* | **33572115** |
| *ALDH2* | **35788888** | *HOXA10* | **31950785** | *MTHFR* | 28046029 |
| *AURKA* | **32572158** | *HPGD* | **35317779** | *NAT2* | 25886288 |
| *BMI1* | **32239639** | *IBSP* | **31709184** | *PDGFRA* | 29358879 |
| *BMP7* | **23504348** | *IGFBP3* | **35782901** | *PLAU* | **33574243** |
| *C2orf40* | **27698864** | *ITGA3* | **35782901** | *POSTN* | **32613365** |
| *CCNA2* | **34737951** | *ITGB4* | **30479571** | *PPP1R3C* | **29844815** |
| *CCND1* | **34611831** | *LAMA3* | 29358879 | *SASH1* | **30443973** |
| *CCNE1* | 28800315 | *LAMB3* | **36415640** | *SH3BGRL2* | 25823933 |
| *COL10A1* | **35117161** | *LAMC2* | **29511340** | *SIX1* | **28260921** |
| *COL11A1* | **34790783** | *MEIS1* | **32819319** | *SIX4* | **33481352** |
| *COL1A1* | **35117161** | *MFAP2* | 29358879 | *SOX2* | **31991109** |
| *COL27A1* | 29358879 | *MGLL* | 25823933 | *SPP1* | **36467891** |
| *COL7A1* | **18331784** | *MLF1* | 29358879 | *SULT1A1* | **12455060** |
| *CYP1A1* | 26455829 | *MMP1* | **27130665** | *SULT1A1* | **12455060** |
| *EGR1* | 29047233 | *MMP10* | **22121946** | *TCF3* | 29358879 |
| *ELN* | 25823933 | *MMP11* | 29358879 | *TP53* | **34611831** |
| *EMP1* | **22888304** | *MMP12* | **35265129** |  |  |

Note. Nine candidate piRNA target genes for esophageal squamous cell carcinoma are highlighted in yellow.
