# Supplementary material for: Extraordinary Interactions of piRNAs with mRNA of Candidate Genes in Esophageal Squamous Cell Carcinoma
Source: Preprints.org preprint supplement (doi:10.20944/preprints202305.1046.v1), 2023-05-15
Supplement: Supplementary file 2 [file supplementary › Supplement 2/Table S2.xlsx]

## Sheet: Лист1
Characteristics of piRNA interaction with mRNA of the AURKA gene
piRNA	Start of BS,nt	mRNA region	ΔG,kJ/mol	ΔG/ΔGm,%	piRNA length, nt
Group 1
piR-126340	410	5'UTR	-180.448	94.44	34
piR-233518	412	5'UTR	-169.835	93.02	34
piR-270357	413	5'UTR	-178.325	93.33	34
piR-127715	414	5'UTR	-176.202	94.31	34
piR-89368	414	5'UTR	-174.08	93.17	34
piR-289985	472	5'UTR	-171.961	95.29	33
piR-85769	472	5'UTR	-174.082	91.11	34
piR-295000	479	5'UTR	-171.961	94.18	34
piR-113908	508	5'UTR	-169.837	90.9	34
piR-258342	508	5'UTR	-171.962	95.29	34
piR-226914	509	5'UTR	-171.961	96.42	33
piR-230823	511	5'UTR	-171.959	93.1	33
piR-287550	512	5'UTR	-169.837	90.9	34
piR-230473	517	5'UTR	-171.958	90	34
piR-199338	518	5'UTR	-178.331	96.55	34
piR-57622	519	5'UTR	-174.083	94.25	34
piR-99677	520	5'UTR	-174.081	93.18	34
piR-257600	521	5'UTR	-174.081	94.25	33
piR-272067	521	5'UTR	-171.959	95.29	33
piR-445186	522	5'UTR	-178.327	96.55	33
piR-454666	522	5'UTR	-176.205	97.64	33
piR-219325	523	5'UTR	-176.206	95.4	34
piR-249982	523	5'UTR	-171.959	95.29	33
piR-282903	523	5'UTR	-169.838	95.23	34
piR-341211	523	5'UTR	-176.203	93.25	33
piR-38326	523	5'UTR	-182.575	97.72	34
piR-197774	524	5'UTR	-171.96	94.18	34
piR-320670	524	5'UTR	-171.958	92.04	33
piR-363930	524	5'UTR	-178.328	94.38	34
piR-424861	524	5'UTR	-180.451	97.7	33
piR-479539	524	5'UTR	-169.836	93.02	33
piR-196512	525	5'UTR	-174.082	95.34	33
piR-347859	525	5'UTR	-176.203	93.25	33
piR-98281	526	5'UTR	-174.081	91.11	34
piR-121234	527	5'UTR	-178.328	94.38	34
piR-325698	527	5'UTR	-178.33	97.67	34
piR-200086	528	5'UTR	-174.081	94.25	33
piR-67883	528	5'UTR	-176.205	96.51	33
piR-306330	530	5'UTR	-178.328	95.45	34
piR-200135	531	5'UTR	-182.574	96.62	34
piR-344301	531	5'UTR	-174.08	92.13	33
piR-264046	533	5'UTR	-171.961	94.18	34
piR-267379	533	5'UTR	-174.081	93.18	33
Group 2
piR-129998	414	5'UTR	-163.465	91.66	32
piR-218781	414	5'UTR	-167.71	91.85	33
piR-55670	414	5'UTR	-161	92	32
piR-93385	414	5'UTR	-168	91	33
piR-212025	416	5'UTR	-165.588	91.76	33
piR-89432	417	5'UTR	-168	90	33
piR-218175	419	5'UTR	-165.589	92.85	32
piR-244925	420	5'UTR	-163.468	91.66	33
piR-363915	434	5'UTR	-167.712	90.8	33
piR-265826	435	5'UTR	-163.468	97.46	31
piR-74077	459	5'UTR	-166	91	33
piR-108578	464	5'UTR	-166	93	32
piR-84204	469	5'UTR	-161	90	33
piR-114804	474	5'UTR	-166	90	34
piR-125598	484	5'UTR	-165.59	89.65	33
piR-89461	490	5'UTR	-163	90	33
piR-228327	491	5'UTR	-163.471	96.24	32
piR-300564	499	5'UTR	-165.593	93.97	33
piR-88365	506	5'UTR	-168	91	33
piR-115026	507	5'UTR	-163.47	89.53	34
piR-120925	512	5'UTR	-165.591	91.76	33
piR-216660	512	5'UTR	-167.714	92.94	33
piR-81461	512	5'UTR	-168	92	34
piR-110734	514	5'UTR	-163	90	34
piR-206181	519	5'UTR	-165.59	95.12	31
piR-224694	521	5'UTR	-165.592	95.12	33
piR-49581	521	5'UTR	-168	94	33
piR-120170	522	5'UTR	-167.713	92.94	33
piR-128529	522	5'UTR	-167.711	91.86	32
piR-145556	523	5'UTR	-168	93	33
piR-69165	524	5'UTR	-166	92	33
piR-123162	526	5'UTR	-163.468	92.76	33
piR-321692	526	5'UTR	-167.711	91.86	32
piR-112665	527	5'UTR	-166	98	30
piR-270870	527	5'UTR	-163.467	92.77	32
piR-302301	528	5'UTR	-167.712	90.8	33
piR-274756	530	5'UTR	-167.713	90.8	34
piR-288286	534	5'UTR	-167.714	92.94	33
Group 3
piR-171123	410	5'UTR	-153	89	31
piR-80574	411	5'UTR	-155	92	31
piR-196933	412	5'UTR	-152.85	93.5	29
piR-196933	412	5'UTR	-152.85	93.5	29
piR-280552	412	5'UTR	-152.85	92.3	30
piR-106574	412	5'UTR	-153	92	30
piR-110480	412	5'UTR	-151	97	27
piR-112620	412	5'UTR	-153	94	29
piR-240870	413	5'UTR	-150.728	94.66	29
piR-247277	413	5'UTR	-159.218	93.74	30
piR-93553	413	5'UTR	-153	94	29
piR-97970	413	5'UTR	-151	95	29
piR-124546	414	5'UTR	-157	91	31
piR-97348	414	5'UTR	-153	90	31
piR-52164	415	5'UTR	-151	90	31
piR-199381	419	5'UTR	-157.099	89.15	33
piR-260145	420	5'UTR	-154.977	94.8	31
piR-45926	420	5'UTR	-157	90	31
piR-87904	420	5'UTR	-153	92	31
piR-108567	426	5'UTR	-153	90	32
piR-23387	428	5'UTR	-153	90	31
piR-58373	463	5'UTR	-155	90	31
piR-458270	464	5'UTR	-152.852	90	30
piR-111928	466	5'UTR	-151	90	31
piR-168109	483	5'UTR	-152.854	86.74	33
piR-368746	483	5'UTR	-157.1	90.24	33
piR-94866	483	5'UTR	-155	91	32
piR-97979	487	5'UTR	-155	92	30
piR-418928	488	5'UTR	-159.222	92.59	31
piR-111328	488	5'UTR	-151	90	31
piR-59667	489	5'UTR	-153	94	30
piR-465061	492	5'UTR	-159.223	91.46	32
piR-480279	499	5'UTR	-159.223	90.36	32
piR-112090	509	5'UTR	-155	92	31
piR-296587	514	5'UTR	-150.732	94.66	30
piR-248088	519	5'UTR	-154.977	98.64	29
piR-30958	519	5'UTR	-151	92	30
piR-30739	520	5'UTR	-151	93	29
piR-107559	520	5'UTR	-151	99	28
piR-196655	522	5'UTR	-152.853	89.99	31
piR-113441	522	5'UTR	-155	95	30
piR-124496	522	5'UTR	-157	95	30
piR-89628	522	5'UTR	-157	90	32
piR-472466	523	5'UTR	-159.222	96.15	30
piR-40345	523	5'UTR	-159	96	31
piR-53090	523	5'UTR	-155	95	30
piR-459703	524	5'UTR	-159.219	90.36	31
piR-83567	524	5'UTR	-153	91	31
piR-88276	524	5'UTR	-153	95	30
piR-250716	525	5'UTR	-154.975	92.4	31
piR-456052	525	5'UTR	-154.973	93.58	29
piR-207907	526	5'UTR	-150.728	97.25	28
piR-116024	527	5'UTR	-155	90	32
piR-30937	530	5'UTR	-153	96	29
piR-454316	531	5'UTR	-152.852	92.3	30
piR-111628	531	5'UTR	-153	92	30
piR-45340	531	5'UTR	-159	93	30
piR-52459	532	5'UTR	-157	91	32
piR-360652	534	5'UTR	-154.975	90.12	31
piR-255833	536	5'UTR	-154.974	90.12	30
