# Supplementary material for: Extraordinary Interactions of piRNAs with mRNA of Candidate Genes in Esophageal Squamous Cell Carcinoma
Source: Preprints.org preprint supplement (doi:10.20944/preprints202305.1046.v1), 2023-05-15
Supplement: Supplementary file 2 [file supplementary › Supplement 2/Table S3.xlsx]

## Sheet: Лист1
Characteristics of piRNA interaction with mRNA BMP7 gene
piRNA	Start of BS,nt	mRNA region	ΔG,kJ/mol	ΔG/ΔGm,%	piRNA length, nt
Group 1
piR-330726	2756	3'UTR	-169.836	94.11	33
piR-98045	2756	3'UTR	-174.081	96.47	32
piR-230766	2773	3'UTR	-171.96	93.1	34
piR-261211	2773	3'UTR	-171.959	94.18	33
piR-43404	2774	3'UTR	-169.837	90.9	34
piR-233596	2778	3'UTR	-171.959	94.18	33
piR-303144	2780	3'UTR	-169.838	94.11	34
piR-239587	2781	3'UTR	-174.084	95.34	34
piR-288181	2781	3'UTR	-174.082	92.13	34
piR-248233	2782	3'UTR	-171.959	93.1	33
piR-69364	2789	3'UTR	-176.205	92.22	34
piR-78897	2790	3'UTR	-169.837	95.23	33
piR-315562	2791	3'UTR	-178.33	96.55	34
piR-419763	2791	3'UTR	-174.082	92.13	34
piR-308269	2792	3'UTR	-178.328	94.38	34
piR-65906	2792	3'UTR	-176.205	94.31	34
piR-121964	2793	3'UTR	-178.33	97.67	34
piR-120553	2794	3'UTR	-176.206	95.4	34
piR-232088	2794	3'UTR	-169.837	96.38	33
piR-265442	2794	3'UTR	-178.33	97.67	34
piR-267892	2794	3'UTR	-169.837	96.38	33
piR-72940	2794	3'UTR	-176.206	96.51	33
piR-207451	2795	3'UTR	-169.838	95.23	33
piR-286690	2796	3'UTR	-178.326	92.3	34
piR-329858	2796	3'UTR	-174.082	94.25	34
piR-431377	2796	3'UTR	-169.837	96.38	32
piR-265682	2797	3'UTR	-171.959	95.29	33
piR-98746	2797	3'UTR	-178.33	97.67	34
piR-102574	2801	3'UTR	-176.207	98.8	33
piR-440219	2801	3'UTR	-176.208	97.64	34
piR-208849	2808	3'UTR	-182.575	96.62	34
piR-215165	2809	3'UTR	-171.961	97.58	33
piR-256683	2809	3'UTR	-171.959	94.18	33
piR-244057	2811	3'UTR	-169.838	98.76	32
piR-450675	2817	3'UTR	-169.841	98.76	33
piR-105645	2818	3'UTR	-169.841	96.38	34
piR-93385	2864	3'UTR	-176.203	95.4	33
piR-232229	2867	3'UTR	-178.327	95.45	33
piR-201378	2869	3'UTR	-171.958	91.01	34
piR-59970	2889	3'UTR	-169.836	93.02	33
Group 2
piR-124546	2729	3'UTR	-161.344	93.82	31
piR-55670	2729	3'UTR	-166	94	32
piR-64640	2744	3'UTR	-163	91	34
piR-96280	2756	3'UTR	-161	93	32
piR-43718	2757	3'UTR	-163	91	33
piR-117231	2758	3'UTR	-161.342	91.56	31
piR-326286	2758	3'UTR	-165.59	92.85	33
piR-298921	2771	3'UTR	-165.59	90.69	33
piR-419315	2779	3'UTR	-163.468	90.58	33
piR-123834	2781	3'UTR	-165.59	90.69	33
piR-104500	2782	3'UTR	-163	93	33
piR-215129	2782	3'UTR	-161.346	91.56	33
piR-323278	2782	3'UTR	-167.715	95.18	33
piR-74335	2785	3'UTR	-161	92	33
piR-230180	2790	3'UTR	-165.59	90.69	33
piR-73426	2790	3'UTR	-168	93	33
piR-95620	2790	3'UTR	-166	93	33
piR-103145	2791	3'UTR	-168	93	33
piR-62510	2791	3'UTR	-163	93	32
piR-95238	2791	3'UTR	-166	90	33
piR-123924	2792	3'UTR	-167.713	91.85	33
piR-319079	2792	3'UTR	-163.467	92.77	32
piR-125135	2794	3'UTR	-163.468	97.46	31
piR-256412	2794	3'UTR	-163.468	97.46	31
piR-167534	2795	3'UTR	-161.345	90.47	33
piR-330771	2795	3'UTR	-163.467	97.46	30
piR-418673	2795	3'UTR	-163.47	95.06	33
piR-77731	2795	3'UTR	-168	93	33
piR-79631	2795	3'UTR	-168	93	33
piR-169382	2796	3'UTR	-161.345	93.82	32
piR-416927	2796	3'UTR	-165.591	95.12	32
piR-69792	2797	3'UTR	-161	94	31
piR-85187	2798	3'UTR	-161	97	30
piR-124237	2800	3'UTR	-167.715	96.34	33
piR-41362	2800	3'UTR	-161	97	30
piR-107766	2802	3'UTR	-168	95	33
piR-300779	2802	3'UTR	-163.468	96.24	31
piR-54346	2803	3'UTR	-168	95	33
piR-276828	2808	3'UTR	-167.715	97.53	32
piR-93793	2808	3'UTR	-163	95	32
piR-130416	2809	3'UTR	-161.346	91.56	33
piR-250413	2813	3'UTR	-163.468	93.9	32
piR-80281	2813	3'UTR	-168	92	34
piR-97487	2815	3'UTR	-166	91	33
piR-348714	2816	3'UTR	-161.346	90.47	33
piR-83485	2817	3'UTR	-163	95	33
piR-211412	2820	3'UTR	-163.472	91.66	34
piR-269025	2820	3'UTR	-161.349	93.82	33
piR-298939	2820	3'UTR	-161.349	93.82	33
piR-330707	2823	3'UTR	-161.351	95	33
piR-61958	2825	3'UTR	-163	96	34
piR-301566	2828	3'UTR	-161.352	92.68	34
piR-269824	2853	3'UTR	-167.716	94.04	34
piR-331375	2864	3'UTR	-165.589	93.97	32
piR-78587	2871	3'UTR	-168	90	34
piR-92384	2884	3'UTR	-168	92	34
piR-93174	2885	3'UTR	-161	95	32
piR-314503	2886	3'UTR	-165.591	93.97	32
piR-42937	2889	3'UTR	-168	95	33
piR-107919	2892	3'UTR	-166	93	32
piR-101260	2899	3'UTR	-166	90	34
piR-40015	2925	3'UTR	-161	93	32
piR-58230	2925	3'UTR	-161	94	31
piR-123461	2932	3'UTR	-163.468	93.9	32
piR-63085	2943	3'UTR	-168	90	34
piR-87066	2950	3'UTR	-161	90	33
piR-71349	2970	3'UTR	-161	95	32
Group 3
piR-150186	2733	3'UTR	-155	90	32
piR-199381	2734	3'UTR	-159	90	33
piR-34287	2740	3'UTR	-151	92	31
piR-108567	2741	3'UTR	-157	92	32
piR-100284	2743	3'UTR	-151	90	31
piR-123953	2755	3'UTR	-151	91	30
piR-373304	2757	3'UTR	-154.972	91.24	30
piR-39121	2760	3'UTR	-157	90	31
piR-283884	2762	3'UTR	-150.729	95.94	28
piR-461447	2769	3'UTR	-152.851	93.5	29
piR-23940	2772	3'UTR	-153	92	30
piR-459838	2772	3'UTR	-152.852	92.3	30
piR-464324	2773	3'UTR	-157.099	92.49	31
piR-48196	2777	3'UTR	-157	90	32
piR-333892	2779	3'UTR	-154.976	93.58	30
piR-23869	2781	3'UTR	-151	92	30
piR-23392	2782	3'UTR	-151	91	30
piR-117243	2783	3'UTR	-155	91	32
piR-259279	2783	3'UTR	-154.977	91.24	32
piR-20279	2784	3'UTR	-155	94	31
piR-20283	2784	3'UTR	-157	94	31
piR-98011	2784	3'UTR	-151	91	31
piR-20282	2785	3'UTR	-155	95	30
piR-20284	2785	3'UTR	-151	93	30
piR-32856	2790	3'UTR	-157	95	31
piR-46975	2790	3'UTR	-159	93	32
piR-175883	2791	3'UTR	-155	90	32
piR-40830	2791	3'UTR	-157	92	31
piR-109865	2792	3'UTR	-155	91	31
piR-44009	2793	3'UTR	-155	92	30
piR-124728	2794	3'UTR	-151	96	29
piR-287478	2794	3'UTR	-159.222	97.4	30
piR-43593	2794	3'UTR	-159	93	32
piR-50951	2794	3'UTR	-153	94	30
piR-85874	2794	3'UTR	-157	96	29
piR-106475	2795	3'UTR	-159	96	31
piR-114777	2795	3'UTR	-159	91	32
piR-40789	2795	3'UTR	-155	96	30
piR-58194	2795	3'UTR	-153	94	30
piR-96423	2795	3'UTR	-155	95	30
piR-123755	2796	3'UTR	-151	96	28
piR-245480	2796	3'UTR	-152.853	97.29	29
piR-246149	2796	3'UTR	-159.221	97.4	29
piR-275164	2796	3'UTR	-150.728	95.94	28
piR-479133	2796	3'UTR	-150.729	94.66	29
piR-118098	2797	3'UTR	-153	94	29
piR-118120	2797	3'UTR	-155	94	31
piR-37919	2797	3'UTR	-153	97	28
piR-91957	2797	3'UTR	-157	97	29
piR-111375	2798	3'UTR	-155	97	30
piR-127894	2798	3'UTR	-159	96	30
piR-256602	2799	3'UTR	-159.223	94.93	32
piR-332499	2800	3'UTR	-150.73	97.26	28
piR-23556	2801	3'UTR	-151	90	31
piR-296698	2801	3'UTR	-157.099	93.66	31
piR-37731	2802	3'UTR	-157	92	31
piR-41237	2802	3'UTR	-151	91	30
piR-122236	2803	3'UTR	-155	94	31
piR-452509	2803	3'UTR	-154.977	92.4	31
piR-45938	2803	3'UTR	-155	91	32
piR-158771	2807	3'UTR	-157	91	32
piR-42433	2809	3'UTR	-159	94	30
piR-469958	2809	3'UTR	-159.222	94.93	31
piR-113797	2811	3'UTR	-155	90	32
piR-121721	2811	3'UTR	-155	94	31
piR-404568	2812	3'UTR	-154.975	90.12	31
piR-50794	2813	3'UTR	-159	93	31
piR-35026	2814	3'UTR	-157	92	31
piR-470012	2814	3'UTR	-157.1	94.87	31
piR-53902	2815	3'UTR	-157	95	30
piR-124937	2816	3'UTR	-157	91	31
piR-280751	2816	3'UTR	-159.222	93.74	31
piR-283456	2819	3'UTR	-154.978	93.58	31
piR-453680	2819	3'UTR	-157.103	94.87	32
piR-114383	2820	3'UTR	-159	94	34
piR-146798	2820	3'UTR	-155	94	33
piR-293511	2825	3'UTR	-152.86	92.3	33
piR-109176	2827	3'UTR	-151	90	33
piR-35736	2828	3'UTR	-153	91	33
piR-46635	2828	3'UTR	-159	96	33
piR-114249	2830	3'UTR	-153	94	33
piR-251673	2831	3'UTR	-152.861	92.3	33
piR-59388	2831	3'UTR	-155	95	33
piR-247382	2840	3'UTR	-152.861	94.73	33
piR-100275	2842	3'UTR	-151	93	32
piR-142882	2854	3'UTR	-153	90	32
piR-40986	2859	3'UTR	-151	92	31
piR-248366	2860	3'UTR	-157.099	91.35	32
piR-114819	2863	3'UTR	-151	91	30
piR-124546	2864	3'UTR	-157	91	31
piR-33002	2867	3'UTR	-151	90	32
piR-32018	2869	3'UTR	-151	92	31
piR-195992	2870	3'UTR	-151	92	30
piR-36273	2874	3'UTR	-157	92	31
piR-37365	2883	3'UTR	-153	96	30
piR-100071	2884	3'UTR	-157	91	32
piR-123257	2889	3'UTR	-157	91	32
piR-170041	2889	3'UTR	-155	89	32
piR-85775	2889	3'UTR	-157	91	30
piR-114982	2890	3'UTR	-151	92	30
piR-111389	2903	3'UTR	-155	91	32
piR-41128	2907	3'UTR	-151	90	31
piR-196606	2940	3'UTR	-155	90	31
piR-197476	2945	3'UTR	-157	91	32
piR-42651	2952	3'UTR	-151	91	30
piR-51081	2954	3'UTR	-151	90	30
piR-59140	2955	3'UTR	-155	95	30
piR-198919	2962	3'UTR	-153	90	31
piR-474372	2972	3'UTR	-154.977	90.12	32
piR-88367	2980	3'UTR	-153	90	32
piR-121728	2981	3'UTR	-155	91	32
