# Supplementary material for: Extraordinary Interactions of piRNAs with mRNA of Candidate Genes in Esophageal Squamous Cell Carcinoma
Source: Preprints.org preprint supplement (doi:10.20944/preprints202305.1046.v1), 2023-05-15
Supplement: Supplementary file 2 [file supplementary › Supplement 2/Table S4.xlsx]

## Sheet: Лист1
Characteristics of piRNA interaction with mRNA ERCC1 gene
piRNA	Start of BS,nt	mRNA region	ΔG,kJ/mol	ΔG/ΔGm,%	piRNA length, nt
Group 1
piR-460837	2597	3'UTR	-171.96	93.1	34
piR-74077	2612	3'UTR	-169.836	93.02	33
piR-75278	2652	3'UTR	-169.837	90.9	34
piR-100378	2657	3'UTR	-171.959	92.04	34
piR-447481	2657	3'UTR	-171.958	91.01	34
piR-83588	2658	3'UTR	-176.204	91.2	34
piR-201766	2659	3'UTR	-171.959	92.04	34
piR-88365	2659	3'UTR	-180.451	97.7	33
piR-113908	2661	3'UTR	-178.329	95.45	34
piR-258342	2661	3'UTR	-174.084	96.46	34
piR-226914	2662	3'UTR	-174.083	97.61	33
piR-230823	2664	3'UTR	-176.205	95.4	33
piR-287550	2665	3'UTR	-176.206	94.31	34
piR-110734	2667	3'UTR	-169.838	93.02	34
piR-230473	2670	3'UTR	-171.958	90	34
piR-458180	2670	3'UTR	-174.083	95.34	33
piR-99677	2673	3'UTR	-171.959	92.04	34
piR-257600	2674	3'UTR	-176.205	95.4	33
piR-272067	2674	3'UTR	-174.083	96.47	33
piR-49581	2674	3'UTR	-169.838	95.23	33
piR-445186	2675	3'UTR	-176.205	95.4	33
piR-454666	2675	3'UTR	-174.083	96.47	33
piR-249982	2676	3'UTR	-169.837	94.11	33
piR-282903	2676	3'UTR	-174.086	97.61	34
piR-38326	2676	3'UTR	-174.083	93.18	34
piR-320670	2677	3'UTR	-169.836	90.9	33
piR-424861	2677	3'UTR	-171.959	93.1	33
piR-121234	2680	3'UTR	-169.837	89.88	34
piR-325698	2680	3'UTR	-176.208	96.51	34
piR-200086	2681	3'UTR	-171.959	93.1	33
piR-306330	2683	3'UTR	-176.206	94.31	34
piR-200135	2684	3'UTR	-174.082	92.13	34
piR-267379	2686	3'UTR	-169.836	90.9	33
piR-288286	2687	3'UTR	-169.837	94.11	33
piR-256248	2693	3'UTR	-169.837	90.9	34
piR-322942	2697	3'UTR	-171.958	91.01	34
piR-141148	2700	3'UTR	-171.956	89.99	33
piR-235025	2701	3'UTR	-169.834	90.9	33
piR-249816	2701	3'UTR	-171.957	94.18	32
piR-196735	2702	3'UTR	-180.447	90.42	34
piR-88158	2704	3'UTR	-169.836	91.95	34
piR-281294	2706	3'UTR	-176.204	93.25	34
piR-45907	2769	3'UTR	-169.838	93.02	34
piR-414171	2770	3'UTR	-171.959	93.1	33
piR-55889	2770	3'UTR	-171.96	92.04	34
piR-311415	2783	3'UTR	-169.838	91.95	34
piR-81620	2785	3'UTR	-169.839	96.38	33
piR-212711	2790	3'UTR	-171.958	91.01	34
piR-196859	2794	3'UTR	-169.833	90.9	32
Group 2
piR-51656	2592	3'UTR	-163	92	32
piR-56610	2597	3'UTR	-163	91	33
piR-75328	2597	3'UTR	-168	92	34
piR-77477	2609	3'UTR	-166	94	32
piR-310643	2610	3'UTR	-167.711	90.8	32
piR-246215	2616	3'UTR	-163.465	90.58	32
piR-108578	2617	3'UTR	-161	90	32
piR-111528	2617	3'UTR	-168	90	34
piR-207007	2617	3'UTR	-163.467	97.46	30
piR-280642	2617	3'UTR	-161.344	94.99	31
piR-198255	2643	3'UTR	-161.344	92.68	31
piR-54709	2652	3'UTR	-163	90	33
piR-45931	2658	3'UTR	-163	92	32
piR-112090	2662	3'UTR	-163	97	31
piR-286560	2662	3'UTR	-167.713	94.04	32
piR-216660	2665	3'UTR	-167.714	92.94	33
piR-259651	2667	3'UTR	-161.347	94.99	32
piR-206181	2672	3'UTR	-161.344	92.68	31
piR-57622	2672	3'UTR	-166	90	34
piR-224694	2674	3'UTR	-161.346	92.68	33
piR-120170	2675	3'UTR	-165.591	91.76	33
piR-128529	2675	3'UTR	-165.589	90.69	32
piR-89628	2675	3'UTR	-161	93	32
piR-219325	2676	3'UTR	-167.714	90.8	34
piR-69165	2677	3'UTR	-163	91	33
piR-123162	2679	3'UTR	-161.346	91.56	33
piR-270870	2680	3'UTR	-161.345	91.56	32
piR-67883	2681	3'UTR	-168	92	33
piR-111720	2691	3'UTR	-163	92	33
piR-49772	2692	3'UTR	-168	92	33
piR-198209	2696	3'UTR	-167.715	96.34	32
piR-117436	2701	3'UTR	-167.712	89.77	34
piR-122287	2701	3'UTR	-165.589	89.65	33
piR-264487	2701	3'UTR	-165.588	90.69	32
piR-201750	2702	3'UTR	-165.588	90.69	32
piR-129650	2706	3'UTR	-161.344	90.47	33
piR-213008	2708	3'UTR	-165.589	91.76	32
piR-41630	2712	3'UTR	-163	95	30
piR-289349	2726	3'UTR	-161.352	99.99	32
piR-365910	2763	3'UTR	-165.593	90.69	34
piR-220306	2769	3'UTR	-167.714	90.8	34
piR-240926	2771	3'UTR	-167.714	92.94	33
piR-104258	2772	3'UTR	-168	90	33
piR-156570	2772	3'UTR	-163.471	91.66	34
piR-97285	2772	3'UTR	-161	90	32
piR-304340	2776	3'UTR	-165.591	93.97	32
piR-55529	2784	3'UTR	-161	90	34
piR-197260	2791	3'UTR	-161.345	92.68	32
piR-300459	2796	3'UTR	-161.344	94.99	31
Group 3
piR-109696	2595	3'UTR	-159	91	32
piR-262168	2595	3'UTR	-150.73	91.02	30
piR-196026	2596	3'UTR	-155	90	32
piR-179142	2603	3'UTR	-157	91	32
piR-179142	2603	3'UTR	-157	91	32
piR-56953	2615	3'UTR	-157	97	30
piR-56953	2615	3'UTR	-157	97	30
piR-58373	2616	3'UTR	-157	91	31
piR-282605	2617	3'UTR	-150.73	93.41	30
piR-419649	2617	3'UTR	-159.222	96.15	30
piR-111928	2619	3'UTR	-153	91	31
piR-295938	2620	3'UTR	-152.852	92.3	30
piR-205790	2622	3'UTR	-152.851	92.3	29
piR-99576	2625	3'UTR	-155	90	33
piR-59306	2628	3'UTR	-151	92	30
piR-101405	2641	3'UTR	-157	91	31
piR-125356	2642	3'UTR	-153	94	30
piR-88657	2642	3'UTR	-159	90	33
piR-196585	2657	3'UTR	-157	94	30
piR-288989	2657	3'UTR	-154.975	94.8	29
piR-113688	2658	3'UTR	-155	94	31
piR-139160	2658	3'UTR	-153	92	31
piR-253974	2659	3'UTR	-157.098	93.67	30
piR-297609	2659	3'UTR	-157.099	92.49	31
piR-101056	2660	3'UTR	-153	90	31
piR-47129	2661	3'UTR	-153	91	30
piR-473448	2661	3'UTR	-159.223	96.15	31
piR-94766	2661	3'UTR	-155	97	30
piR-115747	2662	3'UTR	-157	92	30
piR-274739	2663	3'UTR	-152.852	92.3	30
piR-91823	2663	3'UTR	-153	92	31
piR-148306	2665	3'UTR	-151	93	29
piR-57784	2667	3'UTR	-153	94	31
piR-472330	2669	3'UTR	-152.856	92.3	32
piR-30958	2672	3'UTR	-159	97	30
piR-40345	2676	3'UTR	-151	91	31
piR-472466	2676	3'UTR	-150.73	91.02	30
piR-53090	2676	3'UTR	-153	94	30
piR-83567	2677	3'UTR	-151	90	31
piR-112665	2680	3'UTR	-157	93	30
piR-30937	2683	3'UTR	-151	95	29
piR-454316	2684	3'UTR	-150.73	91.02	30
piR-20572	2697	3'UTR	-153	90	31
piR-286543	2701	3'UTR	-150.728	91.02	30
piR-419099	2701	3'UTR	-157.096	91.35	30
piR-56309	2701	3'UTR	-157	91	31
piR-451649	2702	3'UTR	-159.219	91.46	31
piR-99453	2702	3'UTR	-153	91	30
piR-98659	2706	3'UTR	-153	90	31
piR-43081	2709	3'UTR	-157	93	29
piR-281110	2723	3'UTR	-157.104	91.35	34
piR-298414	2727	3'UTR	-154.983	99.99	31
piR-468441	2729	3'UTR	-159.227	92.59	33
piR-453637	2761	3'UTR	-152.855	90	31
piR-255461	2772	3'UTR	-159.221	91.46	31
piR-96587	2774	3'UTR	-153	91	31
piR-454146	2775	3'UTR	-157.099	92.49	31
piR-455878	2779	3'UTR	-154.978	90.12	33
piR-466769	2779	3'UTR	-152.854	93.5	30
piR-27359	2780	3'UTR	-151	93	30
piR-59915	2781	3'UTR	-157	94	31
piR-57635	2785	3'UTR	-151	90	31
piR-436360	2611	3'UTR	-144.361	99.99	26
