# Supplementary material for: Extraordinary Interactions of piRNAs with mRNA of Candidate Genes in Esophageal Squamous Cell Carcinoma
Source: Preprints.org preprint supplement (doi:10.20944/preprints202305.1046.v1), 2023-05-15
Supplement: Supplementary file 2 [file supplementary › Supplement 2/Table S5.xlsx]

## Sheet: Лист1
Characteristics of piRNA interaction with mRNA GCOM1 gene
piRNA	Start of BS,nt	mRNA region	ΔG,kJ/mol	ΔG/ΔGm,%	piRNA length, nt
Group 1
piR-265340	2458	3'UTR	-174.081	95.34	33
piR-252003	2459	3'UTR	-178.326	93.33	34
piR-452720	2459	3'UTR	-169.835	90.9	34
piR-84285	2459	3'UTR	-170	91	34
piR-87408	2460	3'UTR	-180	96	34
piR-252240	2462	3'UTR	-178.326	93.33	34
piR-297057	2462	3'UTR	-176.202	92.22	33
piR-248658	2463	3'UTR	-171.958	93.1	34
piR-440568	2463	3'UTR	-170	94	33
piR-460837	2463	3'UTR	-178.328	96.55	34
piR-465348	2463	3'UTR	-171.959	96.42	33
piR-56610	2463	3'UTR	-170	94	33
piR-430752	2464	3'UTR	-176	98	33
piR-453300	2464	3'UTR	-171.958	93.1	34
piR-441015	2465	3'UTR	-174	95	33
piR-233003	2466	3'UTR	-174	92	34
Group 2
piR-326769	2453	3'UTR	-168	96	33
piR-53597	2454	3'UTR	-163	90	33
piR-103423	2455	3'UTR	-161	90	33
piR-93411	2456	3'UTR	-168	96	32
piR-446402	2457	3'UTR	-168	95	32
piR-121578	2461	3'UTR	-161	95	30
piR-157278	2463	3'UTR	-168	91	33
piR-450271	2463	3'UTR	-168	92	33
piR-453245	2463	3'UTR	-163.466	90.58	33
piR-115392	2464	3'UTR	-166	94	31
piR-435051	2464	3'UTR	-166	92	31
piR-38031	2465	3'UTR	-168	99	31
piR-429656	2465	3'UTR	-163	92	32
piR-43757	2465	3'UTR	-166	93	31
piR-458324	2465	3'UTR	-161.344	91.56	32
piR-124176	2476	3'UTR	-166	90	33
piR-34813	2477	3'UTR	-163	93	32
piR-196522	2482	3'UTR	-161.344	90	33
piR-250777	2486	3'UTR	-165.591	90.69	34
piR-458324	2486	3'UTR	-161	92	32
Group 3
piR-207007	2456	3'UTR	-159	95	30
piR-217575	2458	3'UTR	-159	95	31
piR-468536	2460	3'UTR	-159	95	30
piR-117518	2460	3'UTR	-157	92	31
piR-148505	2461	3'UTR	-157	91	31
piR-196026	2462	3'UTR	-155	90	32
piR-262168	2462	3'UTR	-155	94	30
piR-243328	2462	3'UTR	-153	91	30
piR-440261	2463	3'UTR	-153	95	30
piR-203536	2463	3'UTR	-151	95	30
piR-205790	2463	3'UTR	-151	91	29
piR-288198	2469	3'UTR	-151	92	30
piR-417971	2483	3'UTR	-151	92	30
piR-422545	2488	3'UTR	-151	92	30
