# Supplementary material for: Extraordinary Interactions of piRNAs with mRNA of Candidate Genes in Esophageal Squamous Cell Carcinoma
Source: Preprints.org preprint supplement (doi:10.20944/preprints202305.1046.v1), 2023-05-15
Supplement: Supplementary file 2 [file supplementary › Supplement 2/Table S6.xlsx]

## Sheet: Лист1
Characteristics of piRNA interaction with mRNA MTHFR gene
piRNA	Start of BS,nt	mRNA region	ΔG,kJ/mol	ΔG/ΔGm,%	piRNA length, nt
Group 1
piR-466505	6182	3'UTR	-176.204	93.25	34
piR-47672	6182	3'UTR	-169.836	95.23	32
piR-372462	6273	3'UTR	-169.838	93.02	34
piR-122268	6280	3'UTR	-171.957	89.99	34
piR-93385	6281	3'UTR	-169.834	91.95	33
piR-232229	6284	3'UTR	-171.958	92.04	33
piR-304851	6284	3'UTR	-171.958	92.04	34
piR-201378	6286	3'UTR	-171.958	91.01	34
piR-91094	6324	3'UTR	-169.835	93.02	33
piR-106472	6378	3'UTR	-171.958	93.1	34
piR-86620	6378	3'UTR	-169.834	91.95	33
piR-64422	6380	3'UTR	-171.958	91.01	34
piR-226219	6382	3'UTR	-169.834	91.95	33
piR-58174	6383	3'UTR	-171.957	89.99	34
piR-308105	6384	3'UTR	-178.326	92.3	34
piR-456736	6385	3'UTR	-169.836	94.11	33
piR-93385	6849	3'UTR	-174.08	94.25	33
piR-89432	6852	3'UTR	-171.957	92.04	33
piR-199381	6854	3'UTR	-169.837	96.38	33
piR-302491	6854	3'UTR	-169.837	96.38	33
piR-244925	6855	3'UTR	-169.837	95.23	33
piR-218542	6856	3'UTR	-171.959	94.18	33
piR-426964	6858	3'UTR	-169.837	95.23	33
piR-293506	6859	3'UTR	-174.085	98.79	33
piR-98045	6876	3'UTR	-169.836	94.11	32
piR-428797	6877	3'UTR	-176.204	92.22	34
piR-475473	6901	3'UTR	-171.962	95.29	34
piR-93385	6984	3'UTR	-169.834	91.95	33
piR-232229	6987	3'UTR	-171.958	92.04	33
piR-66172	6998	3'UTR	-174.082	92.13	34
piR-59970	7009	3'UTR	-171.959	94.18	33
piR-223643	7010	3'UTR	-174.082	93.18	34
piR-426649	7012	3'UTR	-174.081	90.1	34
piR-269757	7023	3'UTR	-171.958	91.01	34
piR-222388	7024	3'UTR	-169.837	93.02	34
piR-275128	7028	3'UTR	-174.082	95.34	34
piR-309582	7031	3'UTR	-171.958	93.1	33
piR-352651	7042	3'UTR	-174.082	92.13	34
piR-474436	7042	3'UTR	-171.961	97.58	33
piR-36604	7045	3'UTR	-169.835	91.95	33
piR-423096	7046	3'UTR	-176.204	93.25	34
piR-84283	7046	3'UTR	-169.837	96.38	33
piR-419461	7047	3'UTR	-169.837	91.95	34
piR-456428	7051	3'UTR	-174.081	91.11	34
piR-54492	7051	3'UTR	-170	92	34
Group 2
piR-114769	6190	3'UTR	-168	92	34
piR-90040	6190	3'UTR	-168	92	33
piR-124983	6280	3'UTR	-165.59	92.85	33
piR-323288	6281	3'UTR	-161.344	92.68	32
piR-318772	6282	3'UTR	-165.589	93.97	32
piR-58462	6286	3'UTR	-168	93	34
piR-314373	6288	3'UTR	-165.589	91.76	32
piR-78587	6288	3'UTR	-168	90	34
piR-101237	6354	3'UTR	-161	90	33
piR-63764	6366	3'UTR	-168	90	34
piR-78919	6379	3'UTR	-161	93	32
piR-43473	6383	3'UTR	-166	90	33
piR-55670	6849	3'UTR	-161	92	32
piR-218175	6854	3'UTR	-165.589	92.85	32
piR-419767	6855	3'UTR	-163.468	91.66	33
piR-360343	6857	3'UTR	-165.592	93.97	33
piR-312666	6862	3'UTR	-167.714	90.8	34
piR-64640	6864	3'UTR	-163	91	34
piR-223282	6866	3'UTR	-165.593	95.12	32
piR-91094	6892	3'UTR	-168	92	33
piR-70255	6897	3'UTR	-166	92	34
piR-90040	6898	3'UTR	-168	92	33
piR-285311	6902	3'UTR	-161.347	94.99	32
piR-311851	6914	3'UTR	-163.468	95.06	31
piR-294919	6915	3'UTR	-163.47	91.66	33
piR-98746	6917	3'UTR	-163	90	34
piR-102574	6921	3'UTR	-161	90	33
piR-106260	6928	3'UTR	-168	90	34
piR-271830	6928	3'UTR	-167.714	91.86	33
piR-61958	6945	3'UTR	-163	96	34
piR-81459	6946	3'UTR	-163	95	34
piR-301566	6948	3'UTR	-165.597	95.12	34
piR-127873	6984	3'UTR	-163.465	92.77	31
piR-230027	6984	3'UTR	-163.465	91.66	32
piR-331375	6984	3'UTR	-165.589	93.97	32
piR-314373	6991	3'UTR	-165.589	91.76	32
piR-215203	7003	3'UTR	-163.468	90.58	33
piR-331637	7004	3'UTR	-167.714	92.94	33
piR-299657	7007	3'UTR	-165.589	92.85	32
piR-124403	7009	3'UTR	-167.714	92.93	34
piR-226003	7009	3'UTR	-167.711	91.86	32
piR-42937	7009	3'UTR	-163	93	33
piR-419011	7012	3'UTR	-167.714	94.04	33
piR-206006	7015	3'UTR	-167.714	90.8	34
piR-202947	7024	3'UTR	-167.714	94.04	33
piR-219679	7025	3'UTR	-167.712	90.8	33
piR-91094	7027	3'UTR	-163	90	33
piR-151236	7029	3'UTR	-163.467	91.66	33
piR-118317	7031	3'UTR	-161.344	91.56	32
piR-65260	7031	3'UTR	-166	96	32
piR-99503	7037	3'UTR	-163	92	33
piR-93300	7040	3'UTR	-166	91	33
piR-111824	7041	3'UTR	-168	92	33
piR-118562	7045	3'UTR	-167.713	89.77	34
piR-58230	7045	3'UTR	-161	94	31
piR-207672	7049	3'UTR	-163.467	93.9	32
piR-365080	7049	3'UTR	-163.467	93.9	32
piR-40702	7049	3'UTR	-166	90	33
piR-234574	7050	3'UTR	-163.466	93.9	31
piR-63609	7050	3'UTR	-168	90	34
piR-322421	7051	3'UTR	-163.466	95.06	31
piR-83452	7051	3'UTR	-168	92	32
piR-123461	7052	3'UTR	-163.467	93.9	32
piR-200317	7053	3'UTR	-165.591	91.76	34
piR-413462	7053	3'UTR	-167.713	90.8	34
piR-121458	7062	3'UTR	-163.469	91.66	33
Group 3
piR-119636	6177	3'UTR	-155	92	31
piR-464555	6179	3'UTR	-157.098	93.67	30
piR-118327	6183	3'UTR	-157	90	31
piR-452283	6185	3'UTR	-150.728	91.02	30
piR-41349	6188	3'UTR	-153	90	31
piR-41349	6188	3'UTR	-153	90	31
piR-255363	6189	3'UTR	-157.099	91.35	31
piR-205917	6273	3'UTR	-154.978	97.33	30
piR-127139	6274	3'UTR	-157	92	32
piR-331375	6281	3'UTR	-159.22	90.36	32
piR-195992	6287	3'UTR	-151	92	30
piR-266647	6289	3'UTR	-154.977	93.58	31
piR-36273	6291	3'UTR	-155	91	31
piR-204963	6301	3'UTR	-154.976	93.58	30
piR-84805	6319	3'UTR	-157	91	31
piR-42968	6364	3'UTR	-151	90	30
piR-98079	6378	3'UTR	-155	90	31
piR-22547	6380	3'UTR	-153	91	30
piR-264113	6381	3'UTR	-152.85	92.3	30
piR-51202	6381	3'UTR	-151	90	30
piR-51343	6381	3'UTR	-151	90	30
piR-99438	6381	3'UTR	-155	95	29
piR-470135	6382	3'UTR	-154.973	90.12	31
piR-208012	6384	3'UTR	-150.728	91.02	30
piR-51440	6388	3'UTR	-151	91	30
piR-93553	6848	3'UTR	-153	94	29
piR-124546	6849	3'UTR	-159	93	31
piR-97348	6849	3'UTR	-159	94	31
piR-41716	6852	3'UTR	-157	91	30
piR-33092	6853	3'UTR	-159	90	33
piR-201471	6854	3'UTR	-157.1	93.66	32
piR-45926	6855	3'UTR	-157	90	31
piR-87904	6855	3'UTR	-153	92	31
piR-44492	6856	3'UTR	-155	90	32
piR-129127	6858	3'UTR	-157	96	31
piR-294873	6858	3'UTR	-152.855	98.62	29
piR-295703	6858	3'UTR	-150.731	95.94	29
piR-333447	6858	3'UTR	-154.977	96.05	30
piR-34287	6860	3'UTR	-159	97	31
piR-108567	6861	3'UTR	-155	91	32
piR-94621	6861	3'UTR	-155	94	30
piR-480129	6862	3'UTR	-154.976	92.4	30
piR-96686	6862	3'UTR	-151	95	30
piR-100284	6863	3'UTR	-151	90	31
piR-478962	6866	3'UTR	-157.101	92.49	32
piR-123953	6875	3'UTR	-151	91	30
piR-284874	6900	3'UTR	-154.978	90.12	33
piR-20279	6904	3'UTR	-151	91	31
piR-20282	6905	3'UTR	-153	94	30
piR-32856	6910	3'UTR	-151	91	31
piR-202422	6921	3'UTR	-159.223	92.59	32
piR-45938	6923	3'UTR	-153	90	32
piR-158771	6927	3'UTR	-155	90	32
piR-130416	6929	3'UTR	-159	90	33
piR-198835	6930	3'UTR	-153	90	31
piR-263478	6932	3'UTR	-157.099	91.35	31
piR-330707	6943	3'UTR	-154.982	91.25	33
piR-109176	6947	3'UTR	-155	92	33
piR-35736	6948	3'UTR	-157	94	33
piR-46635	6948	3'UTR	-157	95	33
piR-85805	6948	3'UTR	-153	91	32
piR-114249	6950	3'UTR	-157	96	33
piR-251673	6951	3'UTR	-157.107	94.87	33
piR-59388	6951	3'UTR	-159	97	33
piR-83463	6956	3'UTR	-151	92	33
piR-53975	6958	3'UTR	-151	96	32
piR-100275	6962	3'UTR	-157	97	32
piR-125466	6972	3'UTR	-159	90	34
piR-47559	6974	3'UTR	-157	90	32
piR-33002	6987	3'UTR	-151	90	32
piR-113563	6988	3'UTR	-159	93	31
piR-34038	6993	3'UTR	-155	91	30
piR-98149	6995	3'UTR	-153	92	30
piR-37365	7003	3'UTR	-153	96	30
piR-264628	7005	3'UTR	-159.221	90.36	32
piR-93174	7005	3'UTR	-159	94	32
piR-55825	7007	3'UTR	-151	90	30
piR-166062	7009	3'UTR	-151	89	30
piR-251649	7009	3'UTR	-150.728	91.02	30
piR-85775	7009	3'UTR	-157	91	30
piR-114982	7010	3'UTR	-153	94	30
piR-451537	7011	3'UTR	-150.728	91.02	30
piR-168667	7013	3'UTR	-151	88	32
piR-210090	7015	3'UTR	-157.099	91.35	31
piR-126251	7018	3'UTR	-151	90	31
piR-290727	7020	3'UTR	-152.854	94.73	30
piR-41128	7027	3'UTR	-157	94	31
piR-83479	7036	3'UTR	-159	95	32
piR-269950	7040	3'UTR	-152.853	91.13	31
piR-57245	7040	3'UTR	-157	92	33
piR-112355	7041	3'UTR	-159	91	32
piR-92545	7041	3'UTR	-151	90	31
piR-276471	7042	3'UTR	-154.975	90.12	31
piR-88833	7044	3'UTR	-153	94	29
piR-40015	7045	3'UTR	-157	90	32
piR-419227	7045	3'UTR	-159.222	94.93	31
piR-134970	7046	3'UTR	-151	91	30
piR-455679	7049	3'UTR	-159.221	92.59	32
piR-452028	7053	3'UTR	-154.974	92.4	30
piR-47213	7053	3'UTR	-157	92	31
piR-41197	7054	3'UTR	-157	90	32
piR-128731	7055	3'UTR	-153	91	31
piR-100313	7056	3'UTR	-157	95	30
