# Supplementary material for: Extraordinary Interactions of piRNAs with mRNA of Candidate Genes in Esophageal Squamous Cell Carcinoma
Source: Preprints.org preprint supplement (doi:10.20944/preprints202305.1046.v1), 2023-05-15
Supplement: Supplementary file 2 [file supplementary › Supplement 2/Table S7.xlsx]

## Sheet: Лист1
Characteristics of piRNA interaction with mRNA SASH1 gene
piRNA	Start of BS,nt	mRNA region	ΔG,kJ/mol	ΔG/ΔGm,%	piRNA length, nt
Group 1
piR-101898	5490	3'UTR	-169.838	93.02	34
piR-459542	5493	3'UTR	-176.205	96.51	33
piR-220013	5497	3'UTR	-180.453	98.83	34
piR-240623	5519	3'UTR	-178.33	96.55	34
piR-42131	5549	3'UTR	-169.839	93.02	34
piR-201766	5558	3'UTR	-169.837	90.9	34
piR-52457	5563	3'UTR	-170	92	34
piR-230473	5569	3'UTR	-171.958	90	34
piR-199338	5570	3'UTR	-174.085	94.25	34
piR-57622	5571	3'UTR	-169.837	91.95	34
piR-99677	5572	3'UTR	-169.836	90.9	34
piR-257600	5573	3'UTR	-169.836	91.95	33
piR-445186	5574	3'UTR	-174.081	94.25	33
piR-454666	5574	3'UTR	-171.959	95.29	33
piR-219325	5575	3'UTR	-171.96	93.1	34
piR-249982	5575	3'UTR	-174.083	96.47	33
piR-341211	5575	3'UTR	-171.958	91.01	33
piR-38326	5575	3'UTR	-178.329	95.45	34
piR-363930	5576	3'UTR	-174.082	92.13	34
piR-424861	5576	3'UTR	-176.205	95.4	33
piR-196512	5577	3'UTR	-169.837	93.02	33
piR-347859	5577	3'UTR	-171.958	91.01	33
piR-121234	5579	3'UTR	-169.837	89.88	34
piR-325698	5579	3'UTR	-169.838	93.02	34
piR-200135	5583	3'UTR	-174.082	92.13	34
piR-267379	5585	3'UTR	-169.836	90.9	33
piR-42474	5588	3'UTR	-172	94	33
piR-49772	5591	3'UTR	-171.959	94.18	33
piR-256248	5592	3'UTR	-174.082	93.18	34
piR-204309	5593	3'UTR	-178.326	91.3	34
piR-322942	5596	3'UTR	-178.328	94.38	34
piR-103213	5600	3'UTR	-169.836	89.88	34
piR-235025	5600	3'UTR	-171.958	92.04	33
piR-96803	5600	3'UTR	-169.834	89.88	33
piR-195359	5652	3'UTR	-169.838	93.02	34
piR-427055	5654	3'UTR	-180.453	98.83	34
piR-26543	5657	3'UTR	-171.959	95.29	32
piR-257961	5659	3'UTR	-171.961	97.58	33
piR-211029	5662	3'UTR	-176.207	97.64	33
piR-197260	5697	3'UTR	-169.837	97.56	32
piR-199698	5698	3'UTR	-174.08	91.11	34
piR-94289	5698	3'UTR	-180.448	93.4	34
piR-196859	5700	3'UTR	-171.955	92.04	32
piR-427104	5700	3'UTR	-169.835	91.95	34
piR-329729	5706	3'UTR	-169.835	96.38	32
piR-83728	5707	3'UTR	-176.204	94.31	34
piR-312657	5711	3'UTR	-178.326	94.38	34
piR-203451	5712	3'UTR	-176.204	95.4	34
piR-111180	5714	3'UTR	-171.958	92.04	34
piR-314249	5714	3'UTR	-178.325	95.45	33
piR-433133	5714	3'UTR	-169.835	96.38	32
piR-44059	5714	3'UTR	-171.958	95.29	33
piR-91910	5714	3'UTR	-171.957	93.1	33
piR-445366	5716	3'UTR	-169.834	96.38	31
piR-245383	5717	3'UTR	-180.45	94.44	34
piR-236772	5718	3'UTR	-169.835	94.11	32
piR-291404	5718	3'UTR	-171.959	96.42	32
piR-438146	5720	3'UTR	-174.083	97.61	33
piR-255077	5721	3'UTR	-169.837	96.38	32
piR-38669	5721	3'UTR	-176	97	33
piR-74093	5721	3'UTR	-171.96	95.29	34
piR-43299	5722	3'UTR	-171.96	96.42	33
piR-433582	5741	3'UTR	-171.958	93.1	33
Group 2
piR-60766	5507	3'UTR	-166	91	33
piR-124176	5509	3'UTR	-165.589	89.65	33
piR-74077	5511	3'UTR	-163	90	33
piR-246215	5515	3'UTR	-165.589	91.76	32
piR-108578	5516	3'UTR	-163	92	32
piR-108578	5516	3'UTR	-163	92	32
piR-40007	5540	3'UTR	-161	90	31
piR-65058	5542	3'UTR	-168	91	34
piR-89461	5542	3'UTR	-163	90	33
piR-44639	5544	3'UTR	-161	94	32
piR-203461	5557	3'UTR	-167.714	90.8	33
piR-120925	5564	3'UTR	-165.591	91.76	33
piR-216660	5564	3'UTR	-163.468	90.58	33
piR-81461	5564	3'UTR	-163	90	34
piR-110734	5566	3'UTR	-163	90	34
piR-206181	5571	3'UTR	-161.344	92.68	31
piR-224694	5573	3'UTR	-161.346	92.68	33
piR-272067	5573	3'UTR	-167.714	92.94	33
piR-49581	5573	3'UTR	-163	92	33
piR-120170	5574	3'UTR	-163.467	90.58	33
piR-128529	5574	3'UTR	-163.465	89.53	32
piR-145556	5575	3'UTR	-163.468	90.58	33
piR-282903	5575	3'UTR	-165.593	92.85	34
piR-197774	5576	3'UTR	-167.714	91.85	34
piR-112665	5579	3'UTR	-161	95	30
piR-67883	5580	3'UTR	-168	92	33
piR-288286	5586	3'UTR	-163.468	90.58	33
piR-249816	5600	3'UTR	-167.711	91.86	32
piR-264487	5600	3'UTR	-167.711	91.86	32
piR-106629	5653	3'UTR	-166	92	34
piR-106629	5653	3'UTR	-166	92	34
piR-201772	5656	3'UTR	-163.468	91.66	33
piR-259985	5657	3'UTR	-163.467	92.77	32
piR-277688	5658	3'UTR	-163.468	91.66	33
piR-290761	5658	3'UTR	-163.467	91.66	32
piR-95784	5658	3'UTR	-163	92	33
piR-133210	5661	3'UTR	-167.714	92.94	33
piR-98263	5662	3'UTR	-166	93	33
piR-111290	5663	3'UTR	-163	90	34
piR-60399	5697	3'UTR	-168	95	32
piR-298313	5710	3'UTR	-161.344	92.68	33
piR-40921	5710	3'UTR	-166	92	33
piR-140279	5712	3'UTR	-165.588	90.69	32
piR-119901	5713	3'UTR	-163.465	90.58	33
piR-91782	5714	3'UTR	-168	93	33
piR-211369	5715	3'UTR	-167.712	92.93	33
piR-259560	5715	3'UTR	-163.465	92.76	32
piR-80990	5715	3'UTR	-163	92	33
piR-250008	5717	3'UTR	-161.343	92.68	32
piR-320159	5719	3'UTR	-163.466	93.9	31
piR-205226	5722	3'UTR	-161.345	93.82	32
piR-220543	5723	3'UTR	-163.468	91.66	33
piR-49680	5723	3'UTR	-161	97	31
piR-58129	5725	3'UTR	-163	92	32
piR-243310	5729	3'UTR	-167.715	96.34	33
piR-201806	5732	3'UTR	-165.593	92.85	34
piR-81358	5735	3'UTR	-161	94	32
piR-355919	5739	3'UTR	-167.712	90.8	33
piR-56130	5741	3'UTR	-166	91	32
piR-50295	5746	3'UTR	-168	100	30
piR-255258	5747	3'UTR	-161.343	91.56	31
Group 3
piR-93170	5491	3'UTR	-153	90	31
piR-157533	5494	3'UTR	-157	92	31
piR-206002	5495	3'UTR	-157.101	91.35	33
piR-100645	5503	3'UTR	-153	90	30
piR-125715	5505	3'UTR	-155	95	29
piR-266635	5509	3'UTR	-159.22	92.59	30
piR-92690	5510	3'UTR	-155	94	30
piR-207007	5516	3'UTR	-152.852	91.13	30
piR-209057	5516	3'UTR	-150.73	92.2	30
piR-280642	5516	3'UTR	-157.099	92.49	31
piR-419649	5516	3'UTR	-154.976	93.58	30
piR-168109	5535	3'UTR	-155	88	33
piR-86925	5546	3'UTR	-159	90	32
piR-274739	5562	3'UTR	-150.73	91.02	30
piR-296587	5566	3'UTR	-150.732	94.66	30
piR-248088	5571	3'UTR	-150.731	95.94	29
piR-30739	5572	3'UTR	-153	95	29
piR-113441	5574	3'UTR	-151	92	30
piR-124496	5574	3'UTR	-153	92	30
piR-40345	5575	3'UTR	-155	94	31
piR-472466	5575	3'UTR	-154.976	93.58	30
piR-53090	5575	3'UTR	-151	92	30
piR-456052	5577	3'UTR	-150.728	91.02	29
piR-123162	5578	3'UTR	-159	90	33
piR-270870	5579	3'UTR	-159.221	90.36	32
piR-52459	5584	3'UTR	-155	90	32
piR-20572	5596	3'UTR	-153	90	31
piR-286543	5600	3'UTR	-152.852	92.3	30
piR-419099	5600	3'UTR	-159.22	92.59	30
piR-454866	5608	3'UTR	-154.977	92.4	31
piR-41630	5611	3'UTR	-155	90	30
piR-82394	5639	3'UTR	-153	92	34
piR-49334	5645	3'UTR	-151	92	32
piR-195850	5651	3'UTR	-155	94	31
piR-48009	5651	3'UTR	-125	94	25
piR-124607	5653	3'UTR	-155	92	32
piR-37464	5657	3'UTR	-153	92	30
piR-40127	5658	3'UTR	-159	94	32
piR-26732	5661	3'UTR	-159	96	30
piR-40434	5661	3'UTR	-157	92	31
piR-453637	5662	3'UTR	-159.222	93.74	31
piR-337733	5663	3'UTR	-157.099	90.24	31
piR-26065	5665	3'UTR	-153	97	29
piR-90850	5697	3'UTR	-157	92	31
piR-459124	5700	3'UTR	-154.974	93.58	30
piR-51330	5700	3'UTR	-153	90	31
piR-54662	5701	3'UTR	-151	93	29
piR-35346	5702	3'UTR	-153	90	30
piR-262865	5707	3'UTR	-157.098	91.35	32
piR-39149	5707	3'UTR	-157	90	31
piR-473115	5713	3'UTR	-150.728	92.2	30
piR-129369	5714	3'UTR	-151	93	29
piR-175633	5714	3'UTR	-157	89	32
piR-202479	5714	3'UTR	-154.973	90.12	31
piR-37172	5714	3'UTR	-153	91	31
piR-457040	5714	3'UTR	-154.974	93.58	30
piR-110748	5718	3'UTR	-157	94	29
piR-115618	5718	3'UTR	-155	95	29
piR-43312	5718	3'UTR	-151	90	31
piR-287031	5719	3'UTR	-157.099	93.66	31
piR-466023	5719	3'UTR	-150.73	94.66	30
piR-261492	5720	3'UTR	-159.22	93.74	30
piR-91371	5720	3'UTR	-151	92	29
piR-37520	5723	3'UTR	-151	92	30
piR-21000	5724	3'UTR	-155	97	29
piR-264058	5724	3'UTR	-152.854	94.73	30
piR-115649	5728	3'UTR	-151	91	30
piR-40423	5730	3'UTR	-155	95	30
piR-80143	5730	3'UTR	-155	90	33
piR-368874	5732	3'UTR	-150.73	91.02	30
piR-209607	5739	3'UTR	-154.976	94.8	30
piR-40518	5741	3'UTR	-157	94	31
piR-472258	5741	3'UTR	-159.222	97.4	30
