# Supplementary material for: Extraordinary Interactions of piRNAs with mRNA of Candidate Genes in Esophageal Squamous Cell Carcinoma
Source: Preprints.org preprint supplement (doi:10.20944/preprints202305.1046.v1), 2023-05-15
Supplement: Supplementary file 2 [file supplementary › Supplement 2/Table S8.xlsx]

## Sheet: Лист1
Characteristics of piRNA interaction with mRNA SIX4 gene
piRNA	Start of BS,nt	mRNA region	ΔG,kJ/mol	ΔG/ΔGm,%	piRNA length, nt
Group 1
piR-209539	4026	3'UTR	-171.959	91.01	34
piR-69443	4027	3'UTR	-171.959	91.01	34
piR-93411	4029	3'UTR	-169.837	97.56	32
piR-450527	4030	3'UTR	-174.082	93.18	34
piR-265340	4031	3'UTR	-176.205	96.51	33
piR-252003	4032	3'UTR	-180.45	94.44	34
piR-452720	4032	3'UTR	-171.958	92.04	34
piR-87408	4033	3'UTR	-176.204	93.25	34
piR-252240	4035	3'UTR	-180.45	94.44	34
piR-297057	4035	3'UTR	-178.325	93.33	33
piR-102253	4036	3'UTR	-169.838	90.9	34
piR-429656	4036	3'UTR	-171.959	96.42	32
piR-460837	4036	3'UTR	-174.082	94.25	34
piR-56610	4036	3'UTR	-171.959	95.29	33
piR-75328	4036	3'UTR	-176.206	96.51	34
piR-430752	4037	3'UTR	-169.836	94.11	33
piR-453300	4037	3'UTR	-171.958	93.1	34
piR-441015	4038	3'UTR	-174.081	95.34	33
piR-233003	4039	3'UTR	-174.081	92.13	34
piR-443379	4042	3'UTR	-178.326	93.33	34
piR-448118	4046	3'UTR	-171.958	91.01	34
piR-246215	4055	3'UTR	-169.835	94.11	32
piR-441242	4074	3'UTR	-174.082	93.18	34
piR-314734	4086	3'UTR	-169.837	96.38	32
piR-203564	4096	3'UTR	-176.203	91.2	34
piR-355748	4097	3'UTR	-176.202	91.2	33
piR-88365	4098	3'UTR	-169.836	91.95	33
piR-113908	4100	3'UTR	-171.959	92.04	34
piR-446108	4101	3'UTR	-169.834	95.23	31
piR-432591	4114	3'UTR	-176.205	97.64	33
piR-219325	4115	3'UTR	-174.082	94.25	34
piR-249982	4115	3'UTR	-171.959	95.29	33
piR-341211	4115	3'UTR	-176.203	93.25	33
piR-38326	4115	3'UTR	-180.451	96.59	34
piR-197774	4116	3'UTR	-176.206	96.51	34
piR-320670	4116	3'UTR	-176.203	94.31	33
piR-424861	4116	3'UTR	-178.327	96.55	33
piR-479539	4116	3'UTR	-174.081	95.34	33
piR-69165	4116	3'UTR	-169.836	94.11	33
piR-196512	4117	3'UTR	-171.959	94.18	33
piR-347859	4117	3'UTR	-174.08	92.13	33
piR-321692	4118	3'UTR	-171.957	94.18	32
piR-98281	4118	3'UTR	-178.327	93.33	34
piR-325698	4119	3'UTR	-176.206	96.51	34
piR-200086	4120	3'UTR	-178.327	96.55	33
piR-302301	4120	3'UTR	-171.958	93.1	33
piR-67883	4120	3'UTR	-174.081	95.34	33
piR-274756	4122	3'UTR	-171.958	93.1	34
piR-306330	4122	3'UTR	-182.574	97.72	34
piR-200135	4123	3'UTR	-186.819	98.87	34
piR-344301	4123	3'UTR	-178.325	94.38	33
piR-267379	4125	3'UTR	-182.573	97.72	33
piR-288286	4126	3'UTR	-169.836	94.11	33
piR-42474	4128	3'UTR	-174.081	95.34	33
piR-233458	4130	3'UTR	-174.079	93.18	32
piR-248674	4130	3'UTR	-180.449	96.59	33
piR-49772	4131	3'UTR	-174.081	95.34	33
piR-256248	4132	3'UTR	-176.204	94.31	34
piR-204309	4133	3'UTR	-180.448	92.39	34
piR-198209	4135	3'UTR	-169.837	97.56	32
piR-322942	4136	3'UTR	-176.204	93.25	34
piR-141148	4139	3'UTR	-178.325	93.33	33
piR-103213	4140	3'UTR	-171.958	91.01	34
piR-249816	4140	3'UTR	-171.957	94.18	32
piR-62328	4140	3'UTR	-169.835	90.9	34
piR-96803	4140	3'UTR	-171.956	91.01	33
piR-196735	4141	3'UTR	-184.693	92.55	34
piR-88158	4143	3'UTR	-169.836	91.95	34
piR-127875	4197	3'UTR	-178.33	96.55	34
piR-459483	4235	3'UTR	-178.325	92.3	34
piR-251725	4241	3'UTR	-174.081	96.46	33
piR-284813	4241	3'UTR	-171.958	98.78	31
piR-89068	4243	3'UTR	-180.448	93.4	34
piR-203451	4246	3'UTR	-169.835	91.95	34
piR-111180	4248	3'UTR	-171.958	92.04	34
piR-314249	4248	3'UTR	-178.325	95.45	33
piR-91910	4248	3'UTR	-176.203	95.4	33
piR-211369	4249	3'UTR	-174.081	96.46	33
piR-259560	4249	3'UTR	-169.835	96.38	32
piR-283817	4250	3'UTR	-178.325	94.38	33
piR-245383	4251	3'UTR	-178.326	93.33	34
piR-236772	4252	3'UTR	-174.081	96.47	32
piR-291404	4252	3'UTR	-169.835	95.23	32
piR-38669	4255	3'UTR	-169.836	93.02	33
piR-43299	4256	3'UTR	-169.837	95.23	33
piR-201806	4266	3'UTR	-169.84	95.23	34
Group 2
piR-126417	4021	3'UTR	-161.349	90.47	34
piR-326769	4026	3'UTR	-163.47	93.9	33
piR-101480	4027	3'UTR	-168	90	34
piR-136156	4027	3'UTR	-166	90	34
piR-53597	4027	3'UTR	-166	91	33
piR-277957	4030	3'UTR	-165.591	90.69	34
piR-109696	4034	3'UTR	-161	93	32
piR-248658	4036	3'UTR	-167.713	90.8	34
piR-115392	4037	3'UTR	-165.588	93.97	31
piR-43757	4038	3'UTR	-166	93	31
piR-58810	4044	3'UTR	-166	92	33
piR-74077	4051	3'UTR	-168	92	33
piR-108578	4056	3'UTR	-161	90	32
piR-280642	4056	3'UTR	-161.344	94.99	31
piR-297238	4060	3'UTR	-165.592	93.97	33
piR-82439	4075	3'UTR	-166	90	34
piR-102731	4076	3'UTR	-168	93	33
piR-342201	4080	3'UTR	-167.711	91.86	32
piR-259729	4088	3'UTR	-161.343	90.47	32
piR-84778	4088	3'UTR	-163	93	32
piR-45931	4097	3'UTR	-161	90	32
piR-115026	4099	3'UTR	-165.592	90.69	34
piR-120925	4104	3'UTR	-163.467	90.58	33
piR-110734	4106	3'UTR	-166	91	34
piR-215249	4111	3'UTR	-167.713	96.34	32
piR-99677	4112	3'UTR	-168	90	34
piR-113441	4114	3'UTR	-161	99	30
piR-120170	4114	3'UTR	-165.59	91.76	33
piR-89628	4114	3'UTR	-163	94	32
piR-145556	4115	3'UTR	-168	93	33
piR-282903	4115	3'UTR	-167.714	94.04	34
piR-161121	4117	3'UTR	-167.711	92.94	32
piR-123162	4118	3'UTR	-167.714	95.17	33
piR-112665	4119	3'UTR	-163	96	30
piR-156470	4119	3'UTR	-163.465	91.66	31
piR-270870	4119	3'UTR	-167.713	95.18	32
piR-45340	4123	3'UTR	-163	95	30
piR-217219	4124	3'UTR	-161.344	92.68	32
piR-52459	4124	3'UTR	-161	94	32
piR-164016	4125	3'UTR	-165.588	91.76	31
piR-50357	4125	3'UTR	-168	90	34
piR-255833	4128	3'UTR	-163.466	95.06	30
piR-92805	4128	3'UTR	-166	92	32
piR-95319	4128	3'UTR	-161	92	32
piR-99837	4129	3'UTR	-168	91	32
piR-111720	4130	3'UTR	-163	92	33
piR-93832	4130	3'UTR	-166	92	33
piR-200211	4131	3'UTR	-163.465	91.66	32
piR-77692	4132	3'UTR	-168	92	32
piR-264487	4140	3'UTR	-165.588	90.69	32
piR-74913	4141	3'UTR	-161	94	30
piR-234352	4178	3'UTR	-161.353	97.43	33
piR-85220	4189	3'UTR	-166	97	33
piR-261130	4192	3'UTR	-161.346	96.2	31
piR-46628	4192	3'UTR	-161	90	32
piR-83273	4192	3'UTR	-163	91	34
piR-211825	4195	3'UTR	-161.346	96.2	31
piR-65134	4195	3'UTR	-168	93	34
piR-115473	4211	3'UTR	-167.716	94.04	34
piR-324730	4222	3'UTR	-163.47	93.9	33
piR-97727	4227	3'UTR	-163	91	34
piR-68233	4228	3'UTR	-166	93	33
piR-261526	4234	3'UTR	-161.343	93.82	31
piR-54179	4234	3'UTR	-166	91	33
piR-414045	4236	3'UTR	-165.589	95.12	32
piR-115499	4241	3'UTR	-163.466	93.9	31
piR-40921	4244	3'UTR	-166	92	33
piR-140279	4246	3'UTR	-166	91	32
piR-202479	4248	3'UTR	-161.343	93.82	31
piR-219505	4248	3'UTR	-163.465	90.58	33
piR-44059	4248	3'UTR	-166	92	33
piR-91782	4248	3'UTR	-163	91	33
piR-80990	4249	3'UTR	-163	92	33
piR-250008	4251	3'UTR	-165.589	95.12	32
piR-110748	4252	3'UTR	-161	96	29
piR-163338	4253	3'UTR	-163.468	90.58	34
piR-320159	4253	3'UTR	-165.588	95.12	31
piR-255077	4255	3'UTR	-163.467	92.77	32
piR-74093	4255	3'UTR	-166	92	34
piR-205226	4256	3'UTR	-167.714	97.53	32
piR-126978	4257	3'UTR	-165.591	91.76	33
piR-220543	4257	3'UTR	-161.344	90.47	33
piR-58129	4259	3'UTR	-163	92	32
Group 3
piR-352865	4013	3'UTR	-152.86	90	34
piR-201797	4018	3'UTR	-150.737	93.42	32
piR-141031	4027	3'UTR	-155	90	32
piR-141068	4027	3'UTR	-159	93	31
piR-52128	4027	3'UTR	-155	90	31
piR-203536	4029	3'UTR	-152.854	95.99	30
piR-84721	4029	3'UTR	-151	93	30
piR-143398	4031	3'UTR	-153	90	31
piR-148505	4031	3'UTR	-159	93	31
piR-50652	4031	3'UTR	-155	96	29
piR-278448	4032	3'UTR	-150.729	94.66	29
piR-288198	4033	3'UTR	-152.852	93.5	30
piR-121578	4034	3'UTR	-159	94	30
piR-195482	4034	3'UTR	-150.729	91.02	31
piR-468536	4034	3'UTR	-154.974	92.4	30
piR-56711	4034	3'UTR	-159	91	32
piR-117518	4035	3'UTR	-159	94	31
piR-105364	4036	3'UTR	-151	92	29
piR-245702	4036	3'UTR	-154.976	96.05	30
piR-93281	4037	3'UTR	-159	93	32
piR-127553	4042	3'UTR	-153	91	31
piR-179142	4042	3'UTR	-159	93	32
piR-338358	4044	3'UTR	-150.728	91.02	30
piR-35670	4044	3'UTR	-153	94	29
piR-125715	4045	3'UTR	-151	92	29
piR-92690	4050	3'UTR	-151	91	30
piR-56953	4054	3'UTR	-151	93	30
piR-207007	4056	3'UTR	-157.098	93.67	30
piR-282605	4056	3'UTR	-150.73	93.41	30
piR-419649	4056	3'UTR	-159.222	96.15	30
piR-458270	4056	3'UTR	-154.974	91.24	30
piR-111928	4058	3'UTR	-153	91	31
piR-295938	4059	3'UTR	-152.852	92.3	30
piR-205790	4061	3'UTR	-152.851	92.3	29
piR-475230	4069	3'UTR	-159.221	92.59	31
piR-272263	4070	3'UTR	-154.975	90.12	31
piR-96244	4075	3'UTR	-159	91	32
piR-101405	4080	3'UTR	-159	93	31
piR-59667	4081	3'UTR	-155	95	30
piR-286705	4089	3'UTR	-150.73	98.61	28
piR-196585	4096	3'UTR	-150.73	89.87	30
piR-292897	4100	3'UTR	-150.729	93.42	29
piR-414808	4100	3'UTR	-152.853	95.99	29
piR-112090	4101	3'UTR	-153	91	31
piR-242476	4102	3'UTR	-150.729	94.66	29
piR-28323	4106	3'UTR	-157	95	30
piR-30715	4112	3'UTR	-157	99	29
piR-92612	4112	3'UTR	-153	97	29
piR-124496	4114	3'UTR	-151	91	30
piR-40345	4115	3'UTR	-159	96	31
piR-472466	4115	3'UTR	-159.222	96.15	30
piR-53090	4115	3'UTR	-155	95	30
piR-459703	4116	3'UTR	-159.219	90.36	31
piR-83567	4116	3'UTR	-153	91	31
piR-88276	4116	3'UTR	-153	95	30
piR-456052	4117	3'UTR	-154.973	93.58	29
piR-207907	4118	3'UTR	-150.728	97.25	28
piR-116024	4119	3'UTR	-159	93	32
piR-242453	4121	3'UTR	-152.851	94.73	29
piR-119654	4122	3'UTR	-153	92	31
piR-30937	4122	3'UTR	-157	99	29
piR-111628	4123	3'UTR	-157	95	30
piR-454316	4123	3'UTR	-157.098	94.87	30
piR-360652	4126	3'UTR	-159.221	92.59	31
piR-38467	4127	3'UTR	-157	91	30
piR-55123	4130	3'UTR	-155	95	29
piR-107716	4131	3'UTR	-153	95	29
piR-20572	4136	3'UTR	-155	91	31
piR-126140	4140	3'UTR	-159	90	32
piR-286543	4140	3'UTR	-150.728	91.02	30
piR-419099	4140	3'UTR	-157.096	91.35	30
piR-99453	4141	3'UTR	-153	91	30
piR-143749	4145	3'UTR	-159	90	30
piR-49707	4146	3'UTR	-155	91	29
piR-457368	4148	3'UTR	-159.22	93.74	30
piR-197404	4150	3'UTR	-159.221	90.36	32
piR-87241	4150	3'UTR	-155	94	31
piR-41630	4151	3'UTR	-155	90	30
piR-120613	4177	3'UTR	-153	94	33
piR-480289	4178	3'UTR	-154.983	93.58	33
piR-120660	4179	3'UTR	-151	91	33
piR-82394	4180	3'UTR	-159	96	34
piR-281238	4181	3'UTR	-157.106	94.87	34
piR-288821	4188	3'UTR	-157.103	90.24	34
piR-294825	4195	3'UTR	-157.1	94.87	31
piR-294427	4196	3'UTR	-150.729	93.42	29
piR-163317	4198	3'UTR	-159	91	33
piR-162975	4203	3'UTR	-157	90	33
piR-26958	4216	3'UTR	-157	95	30
piR-100698	4221	3'UTR	-151	95	29
piR-468998	4221	3'UTR	-152.855	92.3	31
piR-105455	4243	3'UTR	-151	92	30
piR-478342	4243	3'UTR	-157.096	92.49	30
piR-473115	4247	3'UTR	-150.728	92.2	30
piR-129369	4248	3'UTR	-151	93	29
piR-37172	4248	3'UTR	-153	91	31
piR-287031	4253	3'UTR	-159.221	94.93	31
piR-29811	4253	3'UTR	-157	90	32
piR-91371	4254	3'UTR	-155	95	29
piR-20999	4255	3'UTR	-155	91	32
piR-37520	4257	3'UTR	-151	92	30
piR-49680	4257	3'UTR	-155	94	31
piR-21000	4258	3'UTR	-155	97	29
piR-115649	4262	3'UTR	-151	91	30
piR-81358	4269	3'UTR	-159	93	32
