# Supplementary material for: Extraordinary Interactions of piRNAs with mRNA of Candidate Genes in Esophageal Squamous Cell Carcinoma
Source: Preprints.org preprint supplement (doi:10.20944/preprints202305.1046.v1), 2023-05-15
Supplement: Supplementary file 2 [file supplementary › Supplement 2/Table S9.xlsx]

## Sheet: Лист1
Characteristics of piRNA interaction with mRNA SULT1A1 gene
piRNA	Start of BS,nt	mRNA region	ΔG,kJ/mol	ΔG/ΔGm,%	piRNA length, nt
Group 1
piR-219679	1483	3'UTR	-174	94	33
piR-475473	1494	3'UTR	-170	94	34
piR-107049	1507	3'UTR	-172	94	34
piR-351055	1507	3'UTR	-172	92	33
piR-208478	1508	3'UTR	-172	93	34
piR-208478	1508	3'UTR	-172	93	34
piR-294919	1508	3'UTR	-170	95	33
piR-470186	1510	3'UTR	-176	94	34
Group 2
piR-200742	1482	3'UTR	-168	92	34
piR-271830	1483	3'UTR	-166	91	33
piR-311851	1491	3'UTR	-166	96	31
piR-472871	1491	3'UTR	-166	94	33
piR-202947	1498	3'UTR	-161	90	33
piR-239244	1507	3'UTR	-161	92	31
piR-239332	1508	3'UTR	-161	95	31
piR-260105	1508	3'UTR	-161	94	32
piR-327050	1516	3'UTR	-161	95	32
piR-467509	1521	3'UTR	-161	90	33
Group 3
piR-126946	1489	3'UTR	-153	90	31
piR-447258	1492	3'UTR	-155	94	30
piR-284874	1493	3'UTR	-159	93	33
piR-285311	1495	3'UTR	-159	94	32
piR-283779	1506	3'UTR	-159	90	34
piR-285001	1511	3'UTR	-157	91	32
piR-197613	1511	3'UTR	-153	94	31
piR-104710	1513	3'UTR	-155	95	31
piR-202422	1514	3'UTR	-159	93	32
piR-271707	1514	3'UTR	-151	91	31
piR-253465	1517	3'UTR	-157	92	32
