# Supplementary material for: Extraordinary Interactions of piRNAs with mRNA of Candidate Genes in Esophageal Squamous Cell Carcinoma
Source: Preprints.org preprint supplement (doi:10.20944/preprints202305.1046.v1), 2023-05-15
Supplement: Supplementary file 2 [file supplementary › Supplement 2/Table S10.xlsx]

## Sheet: Лист1
Characteristics of piRNA interaction with mRNA TP53 gene
piRNA	Start of BS,nt	mRNA region	ΔG,kJ/mol	ΔG/ΔGm,%	piRNA length, nt
Group 1
piR-101480	2293	3'UTR	-169.836	90.9	34
piR-69443	2293	3'UTR	-174.082	92.13	34
piR-200086	2383	3'UTR	-169.835	91.95	33
piR-264291	2383	3'UTR	-188.941	98.88	34
piR-67883	2383	3'UTR	-171.959	94.18	33
piR-200135	2386	3'UTR	-176.204	93.25	34
piR-101480	2456	3'UTR	-169.836	90.9	34
piR-69443	2456	3'UTR	-174.081	92.13	34
piR-111290	2466	3'UTR	-169.837	93.02	34
piR-54606	2469	3'UTR	-174.083	93.18	34
piR-353782	2476	3'UTR	-171.959	95.29	33
piR-455123	2479	3'UTR	-171.958	94.18	33
piR-292261	2482	3'UTR	-176.206	96.51	34
piR-83600	2493	3'UTR	-169.836	90.9	34
piR-83728	2505	3'UTR	-171.958	92.04	34
piR-111180	2512	3'UTR	-169.836	90.9	34
piR-314249	2512	3'UTR	-169.834	90.9	33
piR-44059	2512	3'UTR	-169.836	94.11	33
piR-91782	2512	3'UTR	-171.959	95.29	33
Group 2
piR-103071	2458	3'UTR	-168	90	34
piR-140496	2292	3'UTR	-168	90	34
piR-171392	2292	3'UTR	-161.345	89.41	33
piR-106322	2293	3'UTR	-166	90	33
piR-141068	2293	3'UTR	-161	94	31
piR-53597	2293	3'UTR	-168	92	33
piR-60730	2293	3'UTR	-161	92	32
piR-62868	2293	3'UTR	-163	91	33
piR-148505	2297	3'UTR	-163	95	31
piR-124176	2315	3'UTR	-167.712	90.8	33
piR-156470	2382	3'UTR	-161.342	90.47	31
piR-124379	2387	3'UTR	-165.589	91.76	33
piR-116628	2454	3'UTR	-165.593	91.76	34
piR-63474	2455	3'UTR	-166	93	34
piR-106322	2456	3'UTR	-166	90	33
piR-106629	2456	3'UTR	-163	91	34
piR-53597	2456	3'UTR	-168	92	33
piR-60730	2456	3'UTR	-161	92	32
piR-62868	2456	3'UTR	-163	91	33
piR-40367	2457	3'UTR	-163	94	32
piR-133210	2464	3'UTR	-166	92	33
piR-76233	2467	3'UTR	-161	94	32
piR-50687	2476	3'UTR	-163	91	33
piR-264641	2477	3'UTR	-161.344	94.99	31
piR-97521	2484	3'UTR	-161	93	33
piR-167574	2509	3'UTR	-163	90	33
piR-119901	2511	3'UTR	-165.589	91.76	33
piR-211369	2513	3'UTR	-165.59	91.76	33
piR-80990	2513	3'UTR	-161	90	33
piR-291404	2516	3'UTR	-161.344	90.47	32
Group 3
piR-155529	2290	3'UTR	-155	90	32
piR-32165	2293	3'UTR	-153	90	31
piR-37715	2293	3'UTR	-157	90	32
piR-52128	2293	3'UTR	-157	91	31
piR-57508	2293	3'UTR	-151	91	30
piR-32194	2294	3'UTR	-153	90	31
piR-143398	2297	3'UTR	-155	91	31
piR-138787	2298	3'UTR	-151	90	30
piR-196026	2301	3'UTR	-155	90	32
piR-112665	2382	3'UTR	-157	92	30
piR-249497	2383	3'UTR	-150.729	97.25	28
piR-111628	2386	3'UTR	-159	96	30
piR-45340	2386	3'UTR	-155	90	30
piR-263222	2387	3'UTR	-157.097	96.1	29
piR-52459	2387	3'UTR	-155	90	32
piR-58561	2390	3'UTR	-155	97	29
piR-134281	2456	3'UTR	-157	92	31
piR-151601	2456	3'UTR	-153	91	30
piR-196061	2456	3'UTR	-157	90	32
piR-32165	2456	3'UTR	-153	90	31
piR-37715	2456	3'UTR	-157	90	32
piR-52128	2456	3'UTR	-157	91	31
piR-57508	2456	3'UTR	-151	91	30
piR-32194	2457	3'UTR	-153	90	31
piR-112987	2463	3'UTR	-153	94	31
piR-82912	2474	3'UTR	-153	96	29
piR-123528	2478	3'UTR	-159	97	30
piR-59915	2485	3'UTR	-151	90	31
piR-365438	2490	3'UTR	-159.222	94.93	31
piR-199288	2495	3'UTR	-151	91	32
piR-140692	2496	3'UTR	-157	92	31
piR-46552	2496	3'UTR	-151	95	29
piR-253967	2497	3'UTR	-154.974	92.4	30
piR-470933	2498	3'UTR	-157.097	91.35	31
piR-47129	2498	3'UTR	-151	90	30
piR-115747	2499	3'UTR	-155	91	30
piR-129369	2512	3'UTR	-155	96	29
piR-250008	2515	3'UTR	-157.098	90.24	32
piR-261492	2518	3'UTR	-154.974	91.24	30
piR-255077	2519	3'UTR	-159.221	90.36	32
piR-49680	2521	3'UTR	-151	91	31
piR-81358	2533	3'UTR	-155	90	32
