# Supplementary material for: Extraordinary Interactions of piRNAs with mRNA of Candidate Genes in Esophageal Squamous Cell Carcinoma
Source: Preprints.org preprint supplement (doi:10.20944/preprints202305.1046.v1), 2023-05-15
Supplement: Supplementary file 2 [file supplementary › Supplement 2/Table S11.docx]

**Table S11**.piRNAs that bind to the mRNA of *AURKA*, *ERCC1*, *SASHA* and *SIX4* genes*.*

| piRNA | *AURKA* | *ERCC1* | *SASHA* | *SIX4* |
| --- | --- | --- | --- | --- |
| piR-74077 | **+** | **+** | **+** | **+** |
| piR-108578 | **+** | **+** | **+** | **+** |
| piR-88365 | **+** | **+** | **-** | **+** |
| piR-115026 | **+** | **-** | **-** | **+** |
| piR-120925 | **+** | **-** | **+** | **+** |
| piR-216660 | **+** | **+** | **+** | **-** |
| piR-81461 | **+** | **-** | **+** | **-** |
| piR-110734 | **+** | **+** | **+** | **+** |
| piR-206181 | **+** | **+** | **+** | **-** |
| piR-224694 | **+** | **+** | **+** | **-** |
| piR-49581 | **+** | **+** | **+** | **-** |
| piR-120170 | **+** | **+** | **+** | **+** |
| piR-128529 | **+** | **+** | **+** | **-** |
| piR-145556 | **+** | **-** | **+** | **+** |
| piR-69165 | **+** | **+** | **-** | **+** |
| piR-123162 | **+** | **+** | **-** | **+** |
| piR-321692 | **+** | **-** | **-** | **+** |
| piR-112665 | **+** | **-** | **+** | **+** |
| piR-270870 | **+** | **+** | **-** | **+** |
| piR-302301 | **+** | **-** | **-** | **+** |
| piR-274756 | **+** | **-** | **-** | **+** |
| piR-288286 | **+** | **+** | **+** | **+** |
| piR-113908 | **+** | **+** | **-** | **+** |
| piR-258342 | **+** | **+** | **-** | **-** |
| piR-226914 | **+** | **+** | **-** | **-** |
| piR-230823 | **+** | **+** | **-** | **-** |
| piR-287550 | **+** | **+** | **-** | **-** |
| piR-230473 | **+** | **+** | **+** | **-** |
| piR-199338 | **+** | **-** | **+** | **-** |
| piR-57622 | **+** | **+** | **+** | **-** |
| piR-99677 | **+** | **+** | **+** | **+** |
| piR-257600 | **+** | **+** | **+** | **-** |
| piR-272067 | **+** | **+** | **+** | **-** |
| piR-445186 | **+** | **+** | **+** | **-** |
| piR-454666 | **+** | **+** | **+** | **-** |
| piR-219325 | **+** | **+** | **+** | **+** |
| piR-249982 | **+** | **+** | **+** | **+** |
| piR-282903 | **+** | **+** | **+** | **+** |
| piR-341211 | **+** | **-** | **+** | **+** |
| piR-38326 | **+** | **+** | **+** | **+** |
| piR-197774 | **+** | **-** | **+** | **+** |
| piR-320670 | **+** | **+** | **-** | **+** |
| piR-363930 | **+** | **-** | **+** | **-** |
| piR-424861 | **+** | **+** | **+** | **+** |
| piR-479539 | **+** | **-** | **-** | **+** |
| piR-196512 | **+** | **-** | **+** | **+** |
| piR-347859 | **+** | **-** | **+** | **+** |
| piR-98281 | **+** | **-** | **-** | **+** |
| piR-121234 | **+** | **+** | **+** | **-** |
| piR-325698 | **+** | **+** | **+** | **+** |
| piR-200086 | **+** | **+** | **-** | **+** |
| piR-67883 | **+** | **+** | **+** | **+** |
| piR-306330 | **+** | **+** | **-** | **+** |
| piR-200135 | **+** | **+** | **+** | **+** |
| piR-344301 | **+** | **-** | **-** | **+** |
| piR-267379 | **+** | **+** | **+** | **+** |
| Note. “+” indicates the presence of a piRNA BS | | | | |
